# Supplementary material
Source: publisher figshare collection journal article supplement (https://brill.figshare.com/articles/dataset/_/5442142)
Supplement: Supplementary file 2 [file 2]

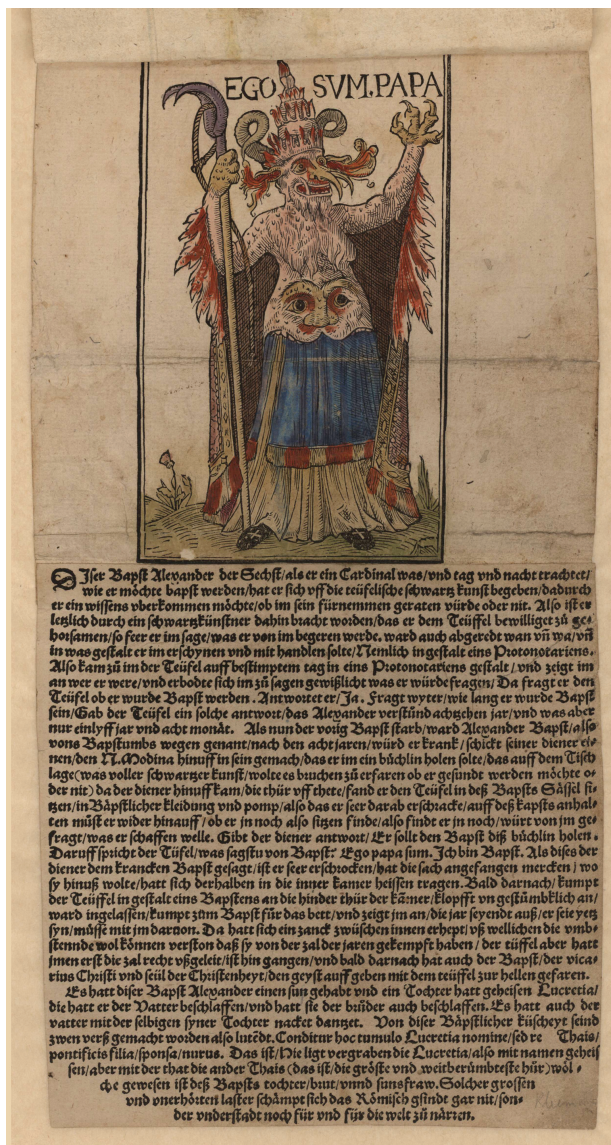

FIGURE 0.2 German, Devil sheet, from Anti-Catholic Broadsheet: The Pope is the Devil (Diser Bapst Alexander der Sechst), after 1555. Hand-colored woodcut and letterpress: 34.5×17 cm (sheet). BSB (Einbl. VII,23 a).

The reader should photocopy, or cut out the *Pope* flap provided on 0.4. Paste the *Pope* flap at the top of this sheet in alignment with the woodcut border of the *Devil* to assemble the complete interactive broadsheet.



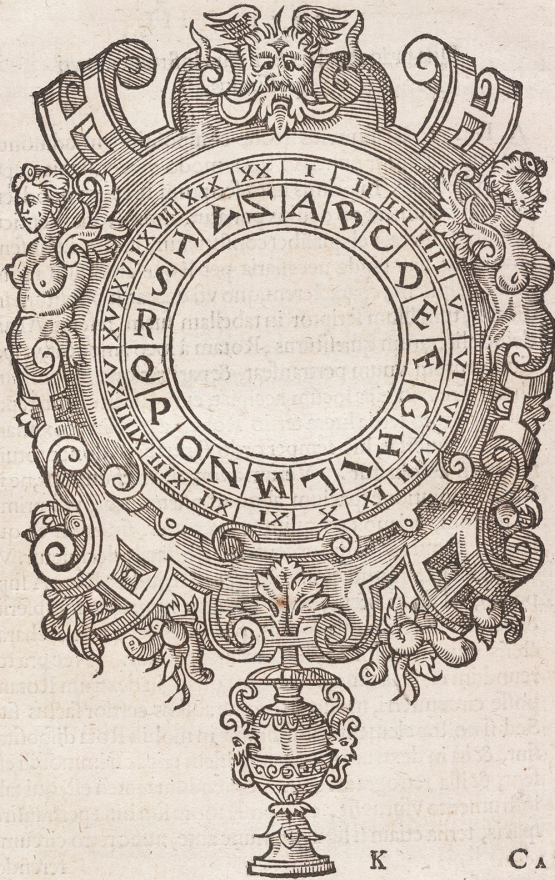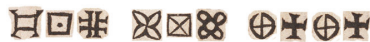

FIGURE 0.3 *Giambattista della Porta* (Italian, ca. 1535–1615), Unassembled Cryptographic Vowelle, from *De furtivis literarum notis*, 1563 [1591], 73. Unassembled base, woodcut, and letterpress: 19.4 × 14.4 cm (sheet). BEINECKE (Z44 2m).

The reader should photocopy, or cut out the dial from 0.4 and sew it with a knotted thread onto the center of this figure. Then Attempt to decode the messAge below the imAge here on 0.3! (Spin the dial to choose a new letter key, or three, for future encryptions.)





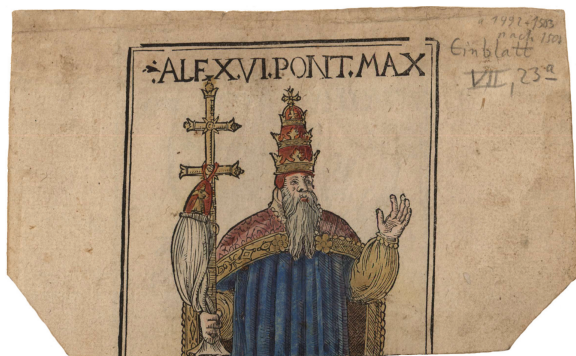

FIGURE 0.4A *German, Pope flap, from Anti-Catholic Broadsheet: The Pope is the Devil (Diser Bapst Alexander der Sechst), after 1555. Hand-colored woodcut with gold: 10.5 × 17 cm (flap). BSB (Einbl. VII, 23 a).*

The reader should photocopy, or cut out this *Pope flap* to assemble the complete interactive broadsheet by adhering it to the top of the *Devil* broadsheet on 0.2.

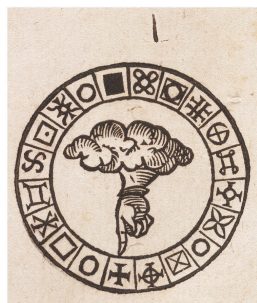

FIGURE 0.4B *Giambattista della Porta (Italian, ca. 1535–1615), Uncut Cryptographic Dial, from De furtivis literarum notis, 1563 [1591], 72. Woodcut dial: 4.2 cm (diameter). BEINECKE (Z44 2m).*

The reader should photocopy, or cut out dial number 1, and sew it with a knotted thread onto the center of 0.3.
