# Supplementary material
Source: publisher figshare collection journal article supplement (https://brill.figshare.com/articles/dataset/_/5442142)
Supplement: Supplementary file 3 [file 2]

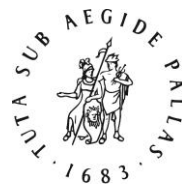

BRILL

Catalogue B: Interactive Books, 1474-ca. 1750  
Accompanying *Interactive and Sculptural Printmaking in the Renaissance*

Suzanne Karr Schmidt

Brill © 2018

**Major Library Collections**

BEINECKE Beinecke Rare Book and Manuscript Library, Yale University, New Haven  
BL British Library, London  
BSB Bayerische Staatsbibliothek, Munich  
HAB Herzog August Bibliothek, Wolfenbüttel  
LoC Library of Congress, Washington, D.C.  
MHL Harvey Cushing/John Hay Whitney Medical Historical Library, Yale University, New Haven  
MHS OXFORD Museum of the History of Science, University of Oxford  
NEWBERRY Newberry Library, Chicago  
NYPL New York Public Library  
SUB GÖTTINGEN Niedersächsische Staats- und Universitätsbibliothek Göttingen  
WALDBURG-WOLFEGG Kunstsammlungen der Fürsten zu Waldburg-Wolfegg

**Scientific**

**Perspective, Geometry and Architecture**

1. Dürer, Albrecht. *Vnderweysung der Messung*. Gedruckt zu Nüremberg: [s.n.], 1525; 1538, with perspective flap. Also *Institutionum geometricarum*. (Latin of *Unterweissung*) Latetiae: Christianum Wechelum, 1535. Beinecke Rare Book and Manuscript Library, Yale University (1525, 1535, 1538); NEWBERRY Library (1525).
2. Vitruvius, Pollio. *De Architectura*. Daniele da Barbaro, ed. Venice: Francesco Marcolini, 1556. Several flaps-architectural completions, volvelle and before and after (6 extensions, 3 volvelles and 2 cancels). BEINECKE; NEWBERRY (1567).
3. Euclides. *Elements of Geometrie*. English translation by H. Billingsley. Preface by M. I. Dee. London: J. Daye, 1570, flaps constructing geometric forms. BEINECKE; NEWBERRY (flaps detached).
4. Stevin, Simon. *Beghinseln der Weeghconst*. Leiden: Christoffel Plantijn, 1586. Herzog August Bibliothek, Wolfenbüttel (HAB).
5. Stevin, Simon. *Wisconstige Gedachtnissen*. 4 vols in 2. Leyden: Bouwensz, 1605-1608, flap. Bibliotheca Palatina; Biblioteca Apostolica Vaticana.



BRILL

6. Caus, Salomon de. *La perspective, avec la raison des ombres et miroirs*, par Salomon de Caus. Londres: Chez Jan Norton imprimeur du Roy de la Grande Bretagne. 1612, with perspective flap and perspective peephole. 1612. BEINECKE; NEWBERRY.
7. Stevin, Simon. *Les Oeuvres mathematiques*. Revue, corrigé, et augmenté par Albert Girard. Leyden: Elsevier, 1634, flap. BEINECKE.
8. Viète, François. *Francisci Vietae Opera mathematica*. 1646, parts for 3 movable diagrams. BEINECKE.
9. Megalinus, Joannes. *Novum memoriale mathematicum nobliorum problematum*. English manuscript ca. mid 17<sup>th</sup> century, volvelle. Cushing/Whitney Medical Historical Library, Yale University (MHL).
10. Bosse, Abraham. *Traité des pratiques geometrales et perspectives*. Paris: Chez l'Auteur, 1665, flap, plate 50. BEINECKE.
11. Moxon, Joseph. *Practical perspective, or, Perspective made easie: teaching, by the opticks, how to delineate all bodies, buildings, or landskips, &c.* London: Printed by Joseph Moxon, and sold at his shop in Russel Street, 1670. Includes mica-pane, 7, and plate LVII have movable slips. British Art Center; Huntington Library, San Marino, CA.

## Medical and Natural Science

12. Medical and astrological manuscripts: British Library: Egerton MS 848, (thirteenth-century volvelle on final folio)  
 Egerton MS 2572, Barber's guild register with fifteenth-century medical volvelle; Egerton 2724, probably fifteenth-century folding calendar.  
 English manuscript; Manuscript 26, ca. 1553, written in red and black ink on vellum, includes a movable astrolabe attached to leaf 36r. Yale MHL.
13. Chrysogonus, Federicus. *De modo collegiati: pronosticandi & curandi febres*, Venice, 1528, "figura supradictorum with movable parts." Yale MHL.
14. Vesalius, Andreas. *De humani corporis Fabrica librorum septem*. Basileae: I. Oporini, 1543, sheets with flaps can be cut out. Copies at the British Library, Cambridge, U.K, and Herzog August Bibliothek (Fig. 4.10), and University of Liège (destroyed), were constructed. NEWBERRY copy is unconstructed.
15. Vesalius, Andreas. *Epitome (De humani corporis fabrica librorum Epitome)*. Latin and German versions, both Basel: Oporinus, 1543. Cambridge, UK, New York Academy of Medicine, Malloch Rare Book Room, and Stockholm Royal Library hold constructed Latin copies; Huntington has a constructed German copy.
16. Cardano, Girolamo. *De Rerum Varietate libri XVII*. Basle, Heinrich Petri, 1557, folio, with woodcut portrait of author on title, volvelle plate for leaf O1. HAB; NEWBERRY.
17. Thurneisser von Thurn, Leonhard. *\*Confirmatio concertationis: oder ein Bestettigung desz jenigen so strittig, haderig, oder zenckisch ist ...* titled sometimes "Bebaiosis agonismou." Berlin, 1576.  
 On urine. Three anatomy flap prints, with two tipped in as whole separate sheets, others as a permanent component; also flap of distillation furnace and a volvelle cogwheel. Yale MHL.
18. Bartisch, Georg. *Ophthalmouleia; das ist, Augendienst*. Dresden: 1583, with two flap diagrams of head and eyes. (Also Frankfurt, 1584.) New York Academy of Medicine, Malloch Rare Book Room. (Fig. 6.3)
19. Schenk, Johann Georg. *Monstrorum Historia Memorabilis*. Frankfurt am. Main: Theodor de Bry (and sons), 1609, with flap covering head of monstrosity, 2. New York Academy of Medicine, Malloch Rare Book Room.
20. Quattrocchi, Alberto. *Disputatio Alberti Quattrocchi medici Veneti, de officinae pharmaceuticae veris*, Venetiis: Apud Antonium Pinellum, 1617, volvelle, 14. National Library of Medicine, Bethesda MD, National Institute of Health (NIH).
21. Gunter, Edmund. *Vvorks of Edmvynd Gunter: conteining the description and use of the sector, corss-staff, and other instruments*. London: Eglesfield, 1653, volvelle. Yale MHL.
22. Descartes, René. *De Hominé, Figuris, et Latinaitate donatus a Florentino*. Leiden: Hacskiana, 1664, anatomical flaps (over viscera). BEINECKE (deficient); Yale MHL has two complete copies.

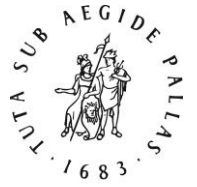

BRILL

23. Hooke, Robert. *Philiosophical Collections*. [London: 1679-1682.], "Rundle" with instructions to cut it out. Yale MHL.

24. Minniti, Francesco. *Armonia astro-medico-anotomica; o'sia, Colleganza degl'astri con il microscosmo, e di questo con I vegetabili, con un'appedice della nautica, ed in calce un raccolto di arcani sperimentati*. Venice, 1690, anatomical flaps. Yale MHL.

Identical with Riccio, Daniel. *Ristretto anotomico; o sia, Aleanza de gl'astri, con l'huomo, e vegetabili*. Yale MHL. There was a single-sheet flap anatomy print from 1663 published by Antonio Moneta that this work copies, one impression in Yale MHL.

## Memory, Rhetoric and the Great Art

25. Earliest Memory and Fate manuscripts with original volvelles:  
Paris, Matthew. *Book of Fate*. Manuscript, 1250s. CCCC, MS 26, fol. 4, Corpus Christi College, Cambridge.
26. 1300s copy of Paris' ca. 1250 *Book of Fate*, Oxford (Digby ms 46), with volvelle in front cover.
27. Llull, Raymond. *Ars Generalis*, manuscript, 1306. British Library, Walker, 3, citing Blumenthal. The work could not be located in London.
28. Anonymous German. *Kalendar*, ca. 1457, Blockbook with hand coloring and a (lost) volvelle dial in the page opposite the month of December. The static rings that remain are a type of astrological calendar with the names of the Zodiac, bordered outside with four griffins or other dragon-like beasts. The calendar also includes charts on Golden Numbers and on the "Sunday letters."  
HAB Cod. Guelf. 1189 Helmst, f. 188r. Fully digitized at: <http://diglib.hab.de/inkunabeln/1189-helmst-2/start.htm>  
Literature: Ad Stijnman, "Ein unbekanntes Blockbuch in Cod. Guelf. 1189 Helmst. Der Herzog August Bibliothek, Wolfenbüttel," *Gutenberg Jahrbuch*, 2009, pp. 79-94.
29. Publicius, Jacopo. [*Ars memorativa*] Cologne: Johann Guldenschaff, 1483? Movable alphabet version of Publicius with woodcut copies after his illustrations many of which are sewn in as volvelles. NYPL Rare Books copy has half of dials. A BL copy fills in those missing.
30. Publicius, Jacopo. *Artes orandi, epistolandi, memorandi*. Venice: Erhard Ratdolt, 1485. Snake-shaped volvelle pointer present in Library of Congress (LoC), and Oxford examples. 1485. BEINECKE's three copies are all deficient. Oxford and Huntington have complete copy of 1490; Huntington also has a 1482 edition with the volvelle. NEWBERRY (1482, 1490, both lacking dial).
31. Llull, Raymond. *Ars Brevis*. Lugduni: per magistrum Stephanus, 1514, volvelle. BEINECKE. (Fig. 1.5)
32. Llull, Raymond. *Illuminati sacre pagine p[ro]fessoris amplissimi magistri Raymundi Lull. Ars magna generalis et vltima*. Lyons, 1517, volvelle. BEINECKE.
33. Llull, Raymond. *Ars brevis* and *Artivli fidei sacrosanctae ac alvtiferae legis Christianae*. Parisiis: Aegidium Gorbinum, 1578, volvelle. BEINECKE.
34. Llull, Raymond. *Opusculum Raymundinum de auditu kabbalistico sive ad omnes scientias introductorium*. Paris: Gilles Gourbin 1578. BEINECKE; NEWBERRY.
35. Llull, Raymond. *Raymundi Lulli Opera ea quae ad adinventam ab ipso artem universalem, scientiarum artiumque omnium breui compendio*. Argentinae: Zetzneri, 1598. NEWBERRY.
36. Llull, Raymond. *Beati Raymundi Lulli doctoris illuminati et martyris tertii ordinis S. Francisci Ars brevis*: Strasbourg: Palma, 1614; 1669; 1744. NEWBERRY (1744).
37. Llull, Raymond. *Opera ea quae ad inventam ab ipso artem universalem*. Strasbourg: Heirs of Lazarus

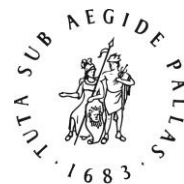

BRILL

Zetzner, 1651. (3 folding tables, 1 folding table with 6 volvelles. Martyan Lan; NEWBERRY.

38. Llull, Raymond. *Clavis Artis Lullianae, et Verae Logices*, ed. by Alstead, Johann Henricus. Strasbourg: Zetzner, 1652, with uncut volvelles. BEINECKE.

39. Kircher, Athanasius. *Mundus subterraneus*. 1665, volvelle. BEINECKE.

40. Kircher, Athanasius. *Ars magna sciendi: in XII libros digesta, qua nova & universali methodo per artificiosum combinationum contextum ...* Amstelodami: Apud Joannem Janssonium a Waesbefe & Viduam Elizei Aeyerstraet, 1669, with a double volvelle on 13. NEWBERRY.



BRILL

## Cryptography and Spelling

41. Trithemius, Johannes. *Polygraphiae libri sex*. Oppenheim, 1518.
42. Trithemius, Johannes. *Polygraphie et vniuerselle escripture cabalistique de m. I. Tritheme abbé*. Paris: I. Keruer, 1561. Multiple multi-layer cryptographic volvelles. BEINECKE; NEWBERRY (1564).
43. Della Porta, Giambattista. *De firtivis literarvm notis vvlgo, De ziferis libri IIII*. Neapoli. Apud Ioa. Mariam Scotum, 1563. Three cryptographic volvelles, often uncut in original sheet; also in Naples in 1602. LoC (1563); NYPL Rare Books (1602).
44. *De firtivis literarvm notis vvlgo*. London: John Wolfe pub., 1591 (as 1563); and an edition correctly dated 1591. BEINECKE copy remains erroneously catalogued as Naples 1563, as does the unconstructed NEWBERRY copy. (Fig. 10.10)
45. *De occultis literarvm notis*. Naples: Jacobum Foillet, 1593, with three cryptographic volvelles; also Zetzner Strasbourg: 1603 and 1606. BEINECKE (1593, Fig. 10.9) and HAB; NEWBERRY (1593, dials unconstructed).
46. Harsdörffer, Georg Philipp. *Deliciae physico-mathematicae*. Nuremberg: Jeremia Du"mlein, 1651. 3 vols in 1. [Also Nuremberg: Wolfgang Moritz Endter and Johann Andrae Endter, 1677.], volvelle calendar of religious and other history. BEINECKE.
47. Harsdörffer, Georg Philipp. *Poetischer Trichter ...* Nuremberg: Wolfgang Endter, 1648-53, with volvelle for constructing German words. BEINECKE.

## Astronomy, Calendars and Timetelling:

### Books with Built-in Volvelles and Instruments

48. Regiomontanus (Johannes Müller). *Calendarium* and afterwards, *Kalendar*. Nuremberg: Johannes Müller, 1474, lunar volvelle and three instruments. BEINECKE. Earliest printed volvelle according to Margaret Stillwell; NEWBERRY.
49. Regiomontanus (Johannes Müller). *Calendarium*. Venice: Erhard Ratdolt, 1476, lunar volvelle and three instruments. Art Institute of Chicago (Cover; Figs. 8.1; 10.3); BEINECKE; NEWBERRY.
50. Regiomontanus (Johannes Müller). *Calendarium*. Venice: Erhard Ratdolt, 1483-5 (Latin, German, Italian), lunar volvelle and three instruments. BEINECKE; NYPL Rare Books; NEWBERRY.
51. Pseudo-Phalaris. *Francisci Arretini in Phalaridis tyranni A*, 1493. Ms volvelle/calendar tipped in. BEINECKE.
52. Regiomontanus (Johannes Müller). *Kalendarium cum vero motu solis [et] duplici modo inueniendi verum motum lune, vulgari*. Zwolle: P. van Os, 1502, volvelle, 21. LOC.
53. Regiomontanus (Johannes Müller). *Kalendarium Teutsch*. [Augsburg: 1512.] Also unlocated 1514 edition. Yale MHL.
54. Stoeffler, Johann. *Elucidatio Fabricae Vsvsque Astrolabii ...*. Oppenheym: Jacob Köbel, 1513, fold-out flap. BEINECKE (two copies).
55. Stoeffler, Johann. *Calendarium Romanum magnus*. Oppenheym: J. Köbel, 1518, movable part. Yale MHL; NEWBERRY.
56. Schöner, Johann. *Aequatorium Astronomicum*. Bamberg: Schöner, 1521, with volvelles. Bamberg UB; Ludwig-Maximilian UB, Munich (Fig. 10.1); Private Collection.
57. Apian, Peter. *Ein künstlich Instrument oder sonnen vr*. Landshut: Johann Wyssenburger, 1524, volvelle 4, 6, 24. BEINECKE.
58. Münster, Sebastian. *Organica Planetarum*. Basel: Henricus Petrus, 1536, volvelles. Bibliotheca Palatina.
59. Münster, Sebastian. *Organum Uranicum*. Basel: H. Petrus, 1536, volvelle. LOC.
60. Stoeffler, Johann. *Cosmographicae Aliquot Descriptiones*. Marburg: Eucharius Cervicornus, 1537, with a cut-out/volvelle. BEINECKE.
61. Apian, Peter. *Astronomicum Caesareum*. Ingoldstadt: Author's Private Press, 1540, numerous volvelles. BEINECKE; BSB (Figs. 10.4-5); Houghton Library, Harvard (Figs. 10.4-5); Yale MHL. See Gingerich (Röttel) for 111 more surviving copies.
62. Focard, Jaques. *Paraphrase de l'astrolabe contenant: les principes de géométrie, la sphère, l'astrolabe, ou, declaration des choses celestes, le miroir du monde, ou, exposition des parties de la terre*. Lyon, par Jean de Tournes, 1546, moving part, fig. 17. Yale MHL.



63. Koebel, Jacob. *Astrolabii declaratio, eivsdemqꝛ usus mire iucundus, non modo astrologis, medicis ...* Parisiis, apud Gulielmum Cauellat, 1550, plate contains volvelles meant to be cut out. BEINECKE; NEWBERRY.
64. Bassantin, Jacques. *Astronomique Discours*. Lyon, 1557; reprint in 1613. Smithsonian.
65. Münster, Sebastian. *Rvdimenta Mathematica*. Basileae: [1551], cut-outs/volvell. BEINECKE.
66. Peucer, Kaspar. *Elementa doctrinae de circulis coelestibus*. Volvelles. 1551, volvelles, F6r, I2r and two others; reprint from 1563. BEINECKE.
67. Peurbach, Georg von. *Theoricae nouae planetarum Georgij Purbach*. Wittenberg, Ioannes Luft 1553. BEINECKE.
68. Theodoricus, Sebastianus. *Novae Qvaestiones Sphaerae*. Vitebergae: [Iohannes Crato], 1567. (Also Vitebergae: 1564, 1570, 1578, 1583 and 1591), volvelle. BEINECKE.
69. Thurneisser zum Thurn, Leonhard. *Archidoxa*. Muenster: Johan Ossenbergh, 1569, with eight folding engraved volvelles. BEINECKE. (Fig. 10.6)
70. Thurneisser zum Thurn, Leonhard. *Archidoxa* text reissued with woodcut *Planeten Tafeln: Archidoxa. Dorin der recht war Motus, Lauff und Gang / auch heimlichkeit / Wirkung und Krafft/ der Planeten / Stirns / und ganzen Firmamets Mutie*. Berlin: Im Grawen Closter, anno 1575. Berlin Staatsbibliothek (Berlin); Bibliotheca Palatina; BSB; Getty Research Institute; HAB; Houghton, Harvard; Kunstsammlungen der Fürsten zu WALDBURG-WOLFEGG (Fig. 10.8C); Österreichische Nationalbibliothek (ONB); Private Collection (Fig. 10.7; 10.8B). See Cat. A 315 for text to the bookbinder.
71. Nale, Nicolo. *Dialogo sopra la sfera del mondo*. Venetia, Appresso Francesco Ziletti, 1579, page 136 includes at the foot a woodcut half circle with attached pointer, accompanied by directions for mounting it as a volvelle on the figure of the earth. Getty.
72. Carrarino, Antonio. *Opera astrologica perpetua ridotta secondo la'nuova riforma dell'anno*. [Rome], 1581, volvelles. BEINECKE.
73. Zamorano, Rodrigo. *Compendio de la arte de navegar*. Seville, 1582, plate with movable parts. BEINECKE.
74. Besson, Jacques. *Theatrum instrumentorum et machinarum*. Ludgduni: Barth. Vincent, 1582, volvelle. BEINECKE; NEWBERRY.
75. Dariot, Claude. *Dariotus redivivus: or a brieve introduction conducing to the iudgement of the stars*. London, Andrew Kemp, 1653, volvelles on leaves F3r, G1r, L1r, V1v, and Z3r; also London: Thomas Purfoot, 1583 and 1598, (volvelles on F3r, G1r). BEINECKE.
76. Gallucci, Giovanni Paolo. *Theatrum Mundi, et Temporis ...* Venice: Ioannem Baptistam Somasum, 1588, with volvelles. (Also 1589) BEINECKE; NEWBERRY.
77. Myriti, Giovanni. *Opusculum Geographicum Rarum Totius eius negotii rationem*. Ingolstadt: Wolfgang Eber, 1590, with five volvelles, (some after Apian's Cosmography), LOC.
78. Gallucci, Giovanni Paolo. *Della fabrica, & vso del nouo horologio vniuersale ad ogni latitudine: nouo*

*trattato diuiso in due parti*. Venice, 1590, with five volvelles, supplied on two sheets. BEINECKE; Yale MHL; NYPL Rare Books.

79. Gallucci, Giovanni Paolo. *Coelestrivm Corporvm et Rervm*. Venice: Damaiano Zenaro, 1593, volvelle. BEINECKE.

80. Gallucci, Giovanni Paolo. *Speculum Uranicum*. Venice: Damiano Zenaro, 1593, with volvelles on rectos of 7, 8, 10, 11, 12, 13, 14, 15, 16, 17, 18 (verso), 19 (verso) opposite 20 [misnumbered 19] (recto). Distinctive printed "boss" slips cover the knot on most versos. BEINECKE, SUB GÖTTINGEN.

81. Blundeville, Thomas. *M. Blundeule His exercises, containing...* London: J Windet, 1594; 1597 (index string on 147; volvelle on 151); 1606; also London: W. Stansby, 1613; 1622. BEINECKE; NEWBERRY (1597; 1636).

82. Gallucci, Giovanni Paolo. *Della Fabrica et Vso di Diversi Stromenti de Astronomica, et Cosmografia . . .* Venice: Ruberto Meietti, 1598, with volvelle, cut-out, BEINECKE.

83. Habermann, Johann. *Christliches Gebät-Buchlein*, Strassburg 1613, calendar volvelle. (First ed. 1572; second 1591). BEINECKE.

84. Pisani Ottavio. *Octavii Pisani Astrologia sev Motvs ...* (1613), with multiple large volvelles. BEINECKE.

85. Ridley, Mark. *A short treatise of magneticall bodies and motions*. London: Printed by Nicholas Okes, 1613, volvelle, 137. BEINECKE.

86. Biancini, Giuseppe. *Sphaera mundi, seu cosmographia*. Bononiae: Typis Sebastiani Bonomij, 1620. volvelle, 227, Getty.

87. Manenti da Este, Francesco. *De Liberatione Astronomiche Perpetve* (Mantua: Aurelio Osanna, 1643), engraved volvelles with cut-outs. Private Collection.

88. Hevelius, Johannes. *Selenographia: sive, Lunae descriptio ...* Gedani: Typis Hünefeldianis, 1647, volvelle on plate 21. BEINECKE; Huntington.

89. Wing, Vincent. *Urania practica: or, Practical astronomie*. London: R Leybourn, 1649, volvelle, 125. Huntington; 1652 edition, Huntington has volvelle on S3r in facsimile; also 1649 edition.

90. Yves de Paris. *Astrologiae nova methodvs*, 1658. Retains some of the volvelles from earlier censored version. BEINECKE; NEWBERRY.

91. Wood, Robert. *The times mended: or, A rectified account of time, by a new luni-solar year; the true way to number our days*. London, Unnumbered plate with volvelle attached, 1681. Huntington.

92. Cantone, Girolamo. *Modo di fare horologi portatili sole, luna, e stelle sopra colonelle, croci, medaglie, e scatolini: da servirsene senza l'Ago Calamitato per diverse elevationi di polo / opera del padre Girolamo Cantone*. 1682, volvelle with three parts. Houghton.

93. Gougeon, Louis. *Cosmographie, ou, Traité de la sphere du mond universel: Contenant une exacte description de la région Etherée & Élémentaire, avec un Traité de l'Horlogeographie*. 1693, volvelle, 14. Adler Planetarium.

## Pamphlets with Anatomies and Instruments on Separate Sheets

There was never a guarantee that these printed instruments would be bound with the rest of the book; many were used before that stage.

94. Waldseemüller, Martin. *Cosmographiae Introductio/ Cym Qvibvs / dam Geome / triae / Ac / Astronomiae Principiis Ad / Eam Rem Necessariis. / Insuper quatuor Americi Vesputij nauigationes*, St. Dié, 1507. NEWBERRY.

95-102. Schöner, Johann. *Lucentissimus and Solidi ac Sphaerici*. Nuremberg: Johann Stuchs, 1515/17-8. NEWBERRY (*Lucentissimus*); *De Nuper Repertis*. 1523; *Globi Stelliferi, Sivi Sphaerare Stellarum and Opusculum geographicum ex diversorum libris ac cartis*, and *Opusculum Geographicum*. Nuremberg: 1533.

103. Münster, Sebastian. *Erklärung des neuen Instrument der Sonnen*. Oppenheim: Münster, 1528, some copies may have five string instruments. It accompanied an interactive map. BSB.

104. Münster, Sebastian. *Erklärung des neuen Instruments durch Seb. Münster, über den Mon.* Worms: Münster, 1529, accompanied a sheet at LMU, Munich, (Fig. 10.2). BSB.

105. Bohemus, Matthias. *Canones Astrolabii ad illustrissimum Principem ac Dominum D. Joannem Saxonie Ducem, etc.* Wittenberg: Peter Jordan, 1529. Accompanied lost Lucas Cranach astrolabe study chart. (Cat. A 294; Fig. 8.7). MHS Oxford.

106. Münster, Sebastian. *Canones super novum instrumentum luminarium: docentes quo pacto per illud invenientur Solis et lunae medii et veri motus*. Basel, 1534. Reprinted in 1554. The pamphlet, accompanied the large woodcut sheet at Basel and BM; BSB (pamphlet).

107. Vogtherr, Heinrich. *Auslegung unnd beschreibung der Anathomie*. Strasbourg, 1539, accompanied Vogtherr's anatomy flap prints. BSB; Yale MHL.

108. Vogtherr, Heinrich. *Aufllegung und beschreibung der Anatomie*. Nuremberg: Hans Guldenmundt, MDXXXIX. BSB; and again ca. 1540, 1541, 1547. Copy of Vogtherr; issued with anatomy flap prints of Guldenmundt's devising. BSB (1541); Wellcome, London (1539). (Fig. 4.3)

109. Apian, Peter. *Quadrans Apiani astronomicus et iam recens inuentus et nunc primum editus*. Ingolstadt: In officina Apiani, VI. Iulii 1532. NYPL Rare Books (lacking instrument sheets); Yale MHL; NEWBERRY (lacking instrument sheets).

110. Apian, Peter. *Horoscopion*. Ingolstadt, 1533, with constructible instruments. Yale MHL; NEWBERRY (lacking instrument sheets).

111. Apian, Peter. *Folium Populi*. Ingolstadt, 1533, with constructible instruments. Yale MHL.

112. Apian, Peter. *Instrumentbuch*. Ingolstadt, 1533, with constructible instruments. Yale MHL; Owen Gingerich, Cambridge, MA. (Fig. 7.4)

113. Frölich, Jacob. *Auslegung unnd beschreibung der Anathomie*. Strasbourg, 1544. Index Aurelianus. Issued from Vogtherr's original blocks, with reprints of his original anatomy flap woodcuts.

114. Hartmann, Georg. *Directorum Medicorum*. Nuremberg: 1554, accompanied his medico-astronomical dials of the same year. No copy located; cited in Franz Ritter, *De Usu Astrolabium*.
115. Weygel, Hans. *Außlegung un bescreybung der Anatomi*. Nuremberg: 1556. HAB; also 1570. HAB. Direct copy after Vogtherr and Guldenmund, issued with copies of Vogtherr's anatomy figures.
116. Geminus, English translation of Vesalius. 1559, third edition (dedicated to Queen Elizabeth) was supplied with a woodcut by monogrammist (or possibly cut by) RS, still in most copies. Cambridge; Huntington; New York Academy of Medicine, Malloch Rare Book Room. Also at Art Institute of Chicago and British Museum as separate sheets.
117. Vimercato, Giovanni-Battista. *Della Descrittione Teorica et Pratica de Gi Horologi Solari*, (Ferrara: Valente Panizza, 1565), fold-out horizontal sundial sheet woodcut. Private Collection.
118. Melanchthon, Philipp. Posthumous *De Anima* commentary accompanying *Anatomical Fugitive Sheets*, Wittenberg, 1573. Presumed to exist.
119. Krabbe, Johann. *Paper Astrolabe*. Published at Munden, 1583. (See Zinner, *Instrumente*, 418.) *Newes Astrolabium* pamphlet may have been published with the device in 1583 and it was certainly reprinted in 1608 (HAB Wolfenbüttel, I A v Soehne), 1609 (Frankfurt, M. Becker), 1625 and 1630 (Wolfenbüttel, El. Hohwein). Constructed example of 1583 astrolabe in MHS Oxford.
120. Chauvet, Jacques. *Instrvction Et Vsage Dv Cosmometre. Ov Instrvment Vniuersel pour les dimen[s]ions, tant Geometriques que Optiques, A[s]tronomiques & Geographiques: De l'inuention de Iacques Chauuet*. Imprint A Paris, Les exemplaires [s]e vendent au mont S. Hilaire, à l'en[s]eigne du Chaudron, 1585. Although the NYPL Rare Books copy does not have any cut-out instruments. His book presumably was sold with the prints. The Florence Bargello has a made-up copy with metal components added on top of the prints.
121. Blagrove, John. *The mathematical iewel, shewing the making, and most excellent vse of a singular instrument so called*. London, 1585. BEINECKE copy has the two plates and the double table bound between the prelim. l. and the text. Cut-out astrolabe.
122. Ritter, Franz. Quadrant pamphlet. *Instructio instrumentalis quadrantis novi, d. i. Beschreibung und Unterricht eines neuen Quadranten*. 6-8 pages and a folding plate, published in 1597 (Nuremberg), 1599 and 1609 (Nuremberg, Chr. Lochner); constructed example at Frankfurt am Main. HAB.
123. Fabri, Ottavio. *L'uso della squadra mobile*. In Venetia; Appresso Francesco Varilleti, 1598. Engraved instrument. NEWBERRY.
124. Ritter, Franz. *Speculum Solis*, (*Mirror of the Sun*), Nuremberg: Paulus Fürst, 1609 (part I), 1611 (part II); also 1660 edition supported by Harsdörffer. BEINECKE; NEWBERRY (book and separate sheets).
125. Remmelin, Johann. *Catoptrum microcosmici*. Ulm: 1613. (Also Augustae, 1619, Ulm, 1639, Frankfurt, 1660, flaps. Art Institute of Chicago, (1613); Yale MHL (1613). Also *Kleiner Welt Spiegel*. Augsburg: J.U. Schönligt for J. Remmelin, 1632. (Augsburg: J.L Remmelin, 1661, Ulm: J.C. Pëurlein, 1720, and Ulm: J.C. Bäurlein, 1720), flaps. Yale MHL. *A Survey of the Microcosme; or, the Anatomy of the Bodies of Man and Woman*. Corrected by

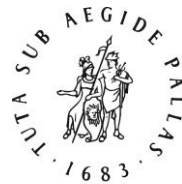

BRILL

Clopton Havers. 3<sup>rd</sup> ed. London: Printed for D. Midwinter, 1738, flaps. Yale MHL.

126. Ritter, Franz. *Astrolabium, d.i. gründliche Beschreibung und unterricht, wie solches herrliche ...*

*astronom. Instrument auff allerley Polus höch ... gefertigt werden soll.* Nuremberg, Chr. Lochner, Verlag B.

Caymox, 1613, with 21 engravings. Possibly issued with separate engraving, Germanisches Nationalmuseum HB (GNM) 2135, Kapsel 1206; HAB.

127. Ritter, Franz. *De Usu astrolabii, posterior pars.* 28 pages, Nuremberg: C. Lochner, 1613—with 15 folding engravings by B. Caymox. BSB copy lacks the engravings.

128. Ritter, Franz. *De Usu Astrolabii.* Nuremberg: Paulus Fürst/ Christoff Gerhard, 1613. Different edition, with (the same) 21 engraved, numbered plates. Contains both parts of the book issued by Caymox. NYPL Science, Industry and Business Library (SIBL).

129. Bartsch, Jacob. *Vsvs astronomicvs planisphaerii stellat.* Strasbourg: Jacob van der Heyden printer, 1615. Instruction pamphlet with constructible astrolabe/instrument. NYPL SIBL.

130. Moreau, Jean. *L'usage de l'astrolabe.* Paris, 1625. Accompanied reissue of Pierre Danfrie's 1584 engraved astrolabe. Also includes pertinent section on the use of paper instruments.

Literature: Turner.

131. Palmer, John. *The catholique planisphaer which Mr. Blagrave calleth the mathematical jewel: briefly and plainly discribed in five books: the first shewing the making of the instrument, the rest shewing the manifold vse of it.* London, 1658, printed instrument. BEINECKE.

132. Joseph Moxon. *Catalogue*, after 1668. Appended to *Mechanick dyalling* of 1668 and thereafter, describing plates for instruments also sold at his shop. Not located. Literature: Bryden.

## Navigation and Cosmography

133. Apian, Peter. *Cosmographicus liber ...* Landshut, 1524, volvelles. BEINECKE; NEWBERRY.
134. Sarzosa, Francisco. *In aequatorem planetarum, libro duo*, 1526, volvelle. Possibly missing in BEINECKE copy.
135. Apian, Peter. *Cosmographia, per Gemmam Frisium ...* Antwerp: Rolandi Bollaert, 1529, with volvelles. (NEWBERRY); Antwerp, 1533 (NEWBERRY); Antwerp, 1539 (BEINECKE); Antwerp, 1540 (BEINECKE; NEWBERRY); Antwerp, 1545 (BEINECKE); Antwerp, 1550 (BEINECKE); Paris, 1550 and 1551 (NEWBERRY); Paris, 1553 (NEWBERRY); Antwerp, 1564 (BEINECKE), and Antwerp, 1574 (BEINECKE; NEWBERRY).
136. Apian, Peter. *Cosmographicus liber...* Gemma Frisius edition, Antwerp, 1540 WALDBURG-WOLFEGG (also included original strings and lead weights); Paris, 1550 and 1551. NEWBERRY (both with original strings and lead weights on sundial volvelle).
137. Sacro Bosco, Joannes de. *Sphaera Ioannis de Sacro Bosco, emendata*. 1546 (imperfect), 1558, 1561, 1568 of *Johannis de sacro Bvsto Libellvs de sphaera*, volvelle to be cut out. BEINECKE; NEWBERRY.
138. Apian, Peter. *Libro del Cosmographia*. Enveres: Gregorio Bontio, 1548. (1<sup>st</sup> ed. In Spanish.), volvelle. BEINECKE; NEWBERRY (two copies).
139. Sá, Diogo de. *De navigatione libri tres ...* Parisiis, 1549, one leaf to be cut out bound at end. BEINECKE.
140. Sacro Bosco, Joannes de. *Libellus de Sphaera*. Viteberg: V. Creuzes, 1549, volvelle. BEINECKE.
141. Schöner, Joannis. *Opera mathematica*. Impressa Norinbergae, in officina Ioannis Montani & Vlrici Neuberi, anno Domini 1551, multiple pages of uninserted volvelle parts. BEINECKE.
142. Cortes, Martin. *Breve compendio de la sphaera y de la arte de navegar*. Seville: Anton Alvarez, 1551, volvelle. BEINECKE; John Carter Brown; NEWBERRY.
143. Apian, Peter. *Cosmographia Petri Apiani, / per Gemmam Frisium apud Louanienses medicum & mathematicum isigne<m>*. Parisiis: Viuantium Gaultherot. 1553. BEINECKE (volvelles defective); NEWBERRY (volvelles intact).
144. Cortes, Martin. *Arte of Navigation ... exemplified by manye Demonstrations*. Translated from the Spanish by Richard Eden. London: Richard Iugge, 1561, volvelle. BEINECKE (also 1572, 1579, 1589, 1596 and 1615, for John Tapp.)
145. Schöner, Andreas. *Gnomice*. Nuremberg: Joa. Montanum, 1562, has a similar volvelle to his father's 1551 work, with the dial and a 25-sided sundial supplied as separate sheets. Bamberg; Cambridge; NYPL Rare Books.  

NYPL doesn't have the tipped-in sheets, Bamberg and Cambridge do. Also Adler Planetarium; Edinburgh University Library; Houghton; Oxford; Victoria and Albert Museum.
146. Cesario, Agostino. *L'Arte del Navigare con il Regimento della Tramontanae*. Italy: 1569, volvelle. Biblioteca Apostolica Vaticana.

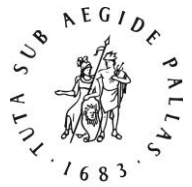

BRILL

147. Coignet, Michel. *Instruction nouvelles des points ... naviguer*. Anvers: 1581, movable parts on 30, 34, 64, 89. BEINECKE.
148. Apian, Peter. *Cosmographia, sive descriptio universi orbis ... G. Frisio*. Antwerp: Arnoldi Coninx, 1584; Antuerpiæ: Apud Ioan. Bellerum. [Typis Ioan. Withagii], Anno 1584, movable part. BEINECKE; NEWBERRY (both editions).
149. Waghenaeer, Lucas Janszoon. *Teerste dell ande Spieghel der zeevaretdt, vande navigatie der Westersche*. Christoff Plantin, 1584, diagram on 21 with moving parts. BEINECKE.
150. Waghenaeer, Lucas Janszoon. *Teerste [-het tweede] deel vande Spieghel der zeevaerdt ...* Plantin, 1585, movable parts, 17. BEINECKE.
151. Waghenaeer, Lucas Janszoon. *Pars Prima [-Altera] Speculum nauticum super nauigatione maris Occidentalis confectum*. Lygdvni Batavorvm: Plantinianis Franciscus Raphelengius, pro Luca Ioannis Aurigario, 1586 (volvelle part II, 17). BEINECKE.
152. Waghenaeer, Lucas Janszoon. *Mariner's mirrov*r. London: J. Charleswood, 1588, diagram on B3r. BEINECKE.
153. Waghenaeer, Lucas Janszoon. *Pars Prima [-het tweede .. vanden] Espeio de la mar sobre la nauigacion*. Cornelis Claesz, Schrijfboeck, 1589 movable diagram on p. 17.
154. Waghenaeer, Lucas Janszoon. *Pars prima [-deuxieme] dv Miroir de la Navigation*. Anvers: Iean Bellere, 1590, diagram, 17. BEINECKE.
155. Severt, Jacques. *De orbis catoptrici seu mapparum mundi principis, descriptionae ac usu*. Paris A. Drouart, 1598. [Also Paris: Baltasar Morel, 1590] BEINECKE (two copies) volvelle.
156. Crescentio Romano, Bartolomeo. *Proteo militare di Bartolomeo Romano*. 1595, folding image. BEINECKE; NEWBERRY.
157. Crescentio Romano, Bartolomeo. *Nautica mediterranea di Bartolomeo Crescentio Romano ... Nella quale si mostra la fabrica delle galee.* Rome: B. Bonfadino, 1602; 1607, volvelles, 414. BEINECKE; Houghton; NEWBERRY; MHS Oxford.
158. Nautonies, Guillamede. *Mecometrie de l'Eymant*. Venice: Chez l'Auteur. 1603-4, cut-out, volvelles. BEINECKE.
159. Waghenaeer, Lucas Janszoon. *Mariner's mirror*. Amsterdam: Jodocus Hondius, 1605, diagram, 17. BEINECKE.
160. Medina, Pedro. *Art de navigver de M. Pierre de Medine ... Contenant toutes les reigles .. necessaires a la bonne nauigation*. Nicolas de Nicolai. Rouen, 1607, volvelle. BEINECKE; NEWBERRY (1545; 1554; 1609; 1628).
161. Blaeu, Willem Janszoon. *Het licht der zee-vaert: daerinne claeli*. Amsterdam: Willem Janszoon 1608, 1620, volvelles. BEINECKE; also 1623-25 and in English, 1622; NEWBERRY (1625).
162. Apian, Peter. *Cosmographie. Ofte beschrijvinge der gheheelder werelt, ... gehschreven in Latijn door Petrus Apianus. Gecorrigeert ende vermeerdert door M. Gamma Frisius*. Amstelredam: C. Claes, 1609. NEWBERRY.

163. Blaeu, Willem Janszoon. *The light of navigation*. Amsterdam, 1612; 1622 Yale University, Sterling Memorial Library Map Room.
164. Hues, Robert. *Tractatus de globis, coelesti et terrestri eorumque usu*. Amsterdam: Hendrik Hondius, 1617; 1624, volvelle on 83. Yale MHL (1624); NEWBERRY (1627).
165. Blaeu, Willem Janszoon. *Flambeau de la navigation, monstrant la description & delineation de toutes les costes & havres ...* 1620, title is a cancel slip over Dutch title page from 1620; volvelle. BEINECKE.
166. Blaeu, Willem Janszoon. *Ardente ou flamboyante*. Amsterdam, 1633. BEINECKE.
167. Blaeu, Willem Janszoon. *Nouveau phalot de la Mer*. Amsterdam, 1635, volvelle. BEINECKE.
168. Norwood, Richard. *The sea-mans practice: contayning a fundamentall probleme in navigation, experimentally verified, namely touching the compasse of the earth and sea*. London: Printed for George Hurlock, 1637, volvelles. BEINECKE (four copies); John Carter Brown (1694).
169. Blaeu, Willem Janszoon. *Zeespiegel*. Amsterdam, 1639, volvelle. BEINECKE.
170. Blaeu, Willem Janszoon. *Sea mirror*. Amsterdam, 1640, volvelle. BEINECKE.
171. Dudley, Sir Robert. *Arcano del Mara*. Florence: Giuseppi Cocchini, 1646-47 and 1661. 2 vols, vol. 1, over 64 volvelles. BEINECKE (1661); NEWBERRY (1646).
172. Colon (m), Jacob Aertsy. *Neuv fierie sea colomne*. Amsterdam, 1649. BEINECKE.
173. Tapp, John. *The sea-man's kalender, or, An ephemerides*. London, 1663, 1664, 1674, made-up and unconstructed volvelles. BEINECKE (four copies).
174. Blaeu, Willem Janszoon. *Institutio astronomica de usu globorum & spærarum cælestium ac terrestrium*. Oxoniæ: W. Hall, 1665; also Amsterdam, 1640 and 1655. NEWBERRY (1669).
175. Denys, Guillaume. *L'art de naviguer perfectioné*, 1666. BEINECKE. (1681 version has 3 volvelles).
176. Sturmy, Samuel. *The mariner's magazine, or Sturmy's mathematical and practical arts: containing the description and use of the scale of scales*. London: E. Cotes for G. Hurlock, 1669, cut-out instrument. BEINECKE; NEWBERRY.
177. Blackborrow, Peter. *The longitude not found*. London, 1678, diagram with a volvelle. BEINECKE.
178. Seller, John. *A pocket book: containing severall choice collections in arithmetick, astronmy, geometry, surveying, dialling, navigation, astrology, geography, measuring, gageing*. London, 1680. BEINECKE (four copies).
179. Seller, John. *Epitome of the art of navigation*, London, 1681, revolving disc, 15. BEINECKE.
180. Seller, John. *A New System of Geography*. London, 1685. BEINECKE (Four copies)
181. Jacobsz, Theunis, called Loots Man. *The lightning columnne or Sea mirror ...* Amsterdam, 1680, volvelle. BEINECKE; NEWBERRY (1668).
182. Jacobsz, Theunis, called Loots Man. *Niew en groote Lotos mans zeespiegel. . .* Amsterdam: J.&C. Loots-Man, 1687, volvelle. Yale University, Sterling Memorial Library Map Collection; NYPL Rare Books.
183. Coronelli, Vincenzo. *Atlante veneto, nel quale si contiene la d.* 1690. Perspective book with a volvelle



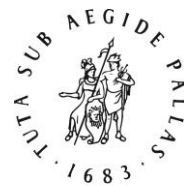

BRILL

and gores. BEINECKE (two copies); NEWBERRY.

184. Vooght, Clae Janszoon. *De Zeemans wegh-wysen*. 1694, with moving part on diagram. BEINECKE.

## Non-Scientific

### Book/Games and Lotteries

185. Flach, Martin. *Tierlosbuch*. Basel, 1485, with a sea-monster-shaped volvelle. Berlin, unique.
186. Anonymous. *Kartenlosbuch* (1506-20 by Zollinger). 1890 facsimile. ONB (85.364-B); London Warburg Inst. (FMH 3160 09/546).
187. Vogtherr, Heinrich. *Eyn schöne Und Gotselige Kurtzweil/eines Christlichen Loßbuchs ...* Strasbourg: Vogtherr, Aug 6 1539. BL; BSB; HAB; Strasbourg Bibliothèque nationale et universitaire; SUB GÖTTINGEN (Fig. 1.6)
188. Wickram, Jörg. *Schöne unnd fast schimpfliche kurtzweil or Lossbuch*. (At least twenty-three editions.) Straßburg, no publisher, 1539, double-sided volvelle. BEINECKE (Zg16 W63+539) is the only copy complete with Unicorn dial (but no verso dial); Basel; Copenhagen Kongelige Bibliothek (18.166 Fol); Oslo UB (LIB.rar.q/281) [Berlin, Wernigerode copies Kriegsverlust].
189. 1543 Strasbourg, Cammerlander, *Kurtzweil*, ONB (5-827 B), with the unicorn and verso dial present; HAB (P4° 469), dial damaged; quarto.
190. 1545 Straßburg, Cammerlander, *Kurtzweil*, [Bolte lists Bremen copy, as *Kriegsverlust*], quarto.
191. 1550 Straßburg, Wendel Rihel, *Kurtzweil*, BSB (4° P.o. Germ. 18M/1), dial page mostly missing; quarto.
192. 1559 Straßburg, Josiam Rihel, *Kurtzweil*, [Bolte lists BSB and Berlin copies, *Kriegsverlust*]; octavo.
193. 1560 Mühlhausen, Peter Schmidt, *Das Weltlich Loszbüch*, HAB, (Lo. 7963.2), missing front matter, [Bolte described a defective copy in Berlin, *Kriegsverlust*]; quarto.
194. 1564 Mühlhausen, Peter Schmidt, *Das Weltlich Loszbüch*, SUB GÖTTINGEN (Poet Germ. II, 2869) Aij and Aij missing; quarto.
195. 1560-86 Straßburg Thiebolt Berger (active dates) *Das Glückradt oder Weltlich Laszbuoch* [Berlin, *Kriegsverlust*; had dials to cut out]; octavo.
196. 1586 Frankfurt, Nicolaß Bassee, *Das Weltlich Loßbuch*, [Bolte found it mentioned in Frankfurt Meßkatalog 1586 (Catalogus novus nundianarum vernalium, f. F. 4 v; also in the Fall 1587 fair catalogue by N.Bassee: Mitt.d.v.f.gesch. in Frankfurt a.M. 6, 106, 1881.) no known copies.
197. 1589 Frankfurt, *Das Glücksrath oder Weltlich Loßbuch* (copy after Berger?); in Weller's Annalen 2,378. No copies known.
198. 1592 Frankfurt, Nicolaum Bassaeum, [no titlepage], (Copy after Bassaeus 1586?), ONB (BE.11V44\*), Fool recto, Unicorn verso dial.
199. 1593, Straßburg, Anton Bertram, *Glückradt oder weltlich Loßbuch*, (Bolte saw one from Clessius, Elenchus 1602, 2, 276), no copy known; octavo.
200. 1594 Straßburg, Anton Bertram, *Das Glücksrad oder Weltlich Loßbuch*, (Bolte wrongly suggests HAB); no copy known; octavo.
201. 1595 Frankfort, Nicol Bass, *Weltlich Loßbuch*, (Bolte—*Meßekatalog* 1595 (Catalogus

- nundinarum vernalium, fol. D4v; not listed with an author), no copy known.
202. 1611 Magdeburg, Johann Franck, *Das Weltlich Loßbuch*, (Bolte: Weller, Annalen, 2,378) No copy known.
203. 1618 Straßburg, Marx von der Heyden, *Das Glücksradt oder Weltlich Laßbuch*, Jena UB in good condition (8 Bud. Var.20 (2)); octavo.
204. 1626 printer, location and title unknown, (Bolte's reference to Leipzig 1626 also unclear), no copy known; octavo.
205. 1671 no printer/location, *Ein Kurtzweiliges Loß oder Drehbuechlein*, Berlin Staatsbibliothek (Na 4258 R); octavo. [Notes from inspection of Berlin copy: In the middle of the text, (after "du bist ein Narr"), comes a large break. In this copy, a slip of paper is pasted on with a very poor quality woodcut print of a unicorn dial and a circle with a coat of arms for the back. This could be the way copies left the printer's. This is probably the edition (or close) to the one in the British Library, as it has a black circle at the bottom of the series of concentric ones, no frame around it, and no background behind the winds.]
206. 1676 no printer/location, *Ein Kurtzweiliges Loß oder Drehbuechlein*, Kunstbibliothek Berlin (Gris.538 kl.); Straßburg BNU (R 100 399); octavo
207. 1702 no printer/location, *Das weltliche Loßbuch*, Basel UB (Wack. 1674), very defective, has sheet to cut out showing the Unicorn and the *Drehknopf*; Unicorn is printed in reverse (to the left)); octavo.
208. 1st half 18th c., no printer/location, *Ein kurtzweiliges Los- oder Drehbuechlein*, Berlin (Na 4262); octavo.
209. 1st half 18th no printer/year, *Kurtzweiliges Loos- oder Dreh- Buechlei*, Berlin (Na 4265); octavo. [Unicorn and square with angels present, but worm-eaten (almost the entire interior of the wheel is gone).] Gert-Roloff incorrectly states that this work is *Kriegsverlust*.
210. 1<sup>st</sup> half 18<sup>th</sup> century, *Kurtzweiliges Loos- oder Dreh- Buechlein*, Berlin (Na 4266 R); octavo.
211. *Karte"nlossbuch: Darinnen auss H. Schrifft vil Laster gestrafft, vnd heylsamer Leeren angezeygt werden ...* Zu Strassburg, Bein M. Jacob Kammerlander, 1543. Fourth plate has double-sided unicorn volvelle reprinted from Wickram 1543. BEINECKE (FIG. 11.8); HAB; ONB.  
Literature: Muller, Zollinger, Bolte.
212. Pambst, Paulus. *Loßbuch zu ehren der Römischen, Ungarischen und Böhmischen Künigin*. Strasbourg: Balthasar Beck, 1546. BEINECKE; BSB (two copies); Budapest; GNM Nuremberg; SUB GÖTTINGEN; HAB (two copies); LoC (Rosenwald); NEWBERRY; Paris Arsenal; Rastatt, Kungl. Biblioteket Sweden; Schweinfurt Bibliothek Otto Schäfer; Stuttgart; Würzburg.  
Strasbourg, Yale and Göttingen's dials are reversed; Strasbourg's is missing; while the BL, BSB, BUDAPEST, both copies at HAB, AND the LoC Rosenwald copies are all correctly constructed with the Christ Child on the recto and Angel on the verso. The GNM, Stuttgart, Schweinfurt, Paris, Rastatt, Swedish and Würzburg copies could not be consulted. There was also a copy in the C. Fairfax Murray collection. See 1913 auction cat., no. 320 (volvelle inserted incorrectly.) (VD P 174) The NEWBERRY copy, acquired in 2017, lacks the volvelle, but has a supplied alchemical engraving patch on the verso. SUB GÖTTINGEN (Figs. 11.9-11; 13)



BRILL

213. David, Johannes. *Veridicus Christianus*. Antwerp, 1606. Fortune-telling engraved volvelle with cut-out windows. Illustrations generally attributed to Theodor Galle. BEINECKE; Getty Research Institute (1601; Fig. 3.8); NEWBERRY.
214. Spirito, Lorenzo, Dutch. *T boec van der auōturenende van tijt cortīge, van versinnen*. Antuuerpen: By J. van Ghele, 1608. NEWBERRY (Landsknecht volvelle).
215. Wither, George. *A Collection of Emblemes*. London: By AM for Robert Allot, 1635, two woodcut volvelle lottery dials. BEINECKE; Lewis Walpole; NEWBERRY.
216. B. R. (Crouch, Nathaniel) *Delights for the Ingenious: in above fifty select and choice emblems, divine and moral, ancient and modern*. London: 1684. (A "Lottery Wheel.") Wheel, pointer lacking on 207. BEINECKE; NEWBERRY.



BRILL

## Cut-Out Books

217. Murner, Thomas. *Chartiludium Institute Summarie doctore Thoma Murner memorante et ludente*.

Johannes Knobloch, 1518 reprint of 1502 book, which was possibly meant to be cut out and used as a deck of cards. GNM.

218. Murner, Thomas. *Logica memoratiua. Chartiludium logice, siue totius dialectice memoria; & nouus Petri Hispani textus emendatus: cum iucundo pictasmatis exercitio*. Strasbourg: Johann Grüninger, 1508, possibly meant to be cut out and used as a deck of cards. GNM; NEWBERRY (1508; 1629).

219. Ringmann, Matthias. *Grammatica / Figvrata. / Octo Partes Orationis/ Secvn- / dum Donati editionem & regulam Remigij / ita imaginibus expre[ss]æ vt pueri iucu- / do Chartarum ludo faciliora Grāma- / ticæ præludia di[s]cere & exer- / cere queant. / Tetra[s]tichon*. [Saint Dié: Gymnase vosgien, 1509]. Possibly meant to be cut out and used as a deck of cards. NYPL Rare Books.

220. Amman, Jost. *Kartenbuch. Charta lusoria*. Nuremberg: durch Leonhardt Heussler, anno 1588. The cards may also be meant to be cut out. BEINECKE.

## Costume, Emblem and Stammbücher, Festival Books

221. Zarlino, Gioseffo. *Clodiensis sereniss. reip. venetiarm in aede d. Marci mvsicorvm magistri, de vera anni forma, siue de recta eius emendatione*. Venetijs: Officina Varisciana, 1580. Movable diagrams. BEINECKE.
222. Bertelli, Pietro. *Diversaru[m] nationum habitus*. Venice, 1589. Editions of three volume set published in 1589 (first volume only), 1591 (first and second), 1592-4 (first and second) and 1596 (third volume). The first volume contains three flapped images: plate 7: *Cortegiana Veneta*; plate 31 *Nobilis Neapolitana*; plate 80 *Sponsa Turca Constantinopolitania*. The second volume contains two more: plate 16, *Ritus Hetruwig*; plate 63, *Novizze in Gondola*.  
BEINECKE (1589; Figs. 12.2; 12.8); Trinity College and Oberlin (1592-4; 1596); American Academy in Rome (1594); BL (1594, 1596); BSB (1591); Glasgow (1589-1596); ONB (1589, 1594-1596); Royal Library, Sweden (1596).
- 223-24. Bry, Theodor de. *Nobilitatae Emblemata*. Frankfurt am Main, 1592 (octavo); 1593 (quarto, with borders.) Both have a barrel erotica flap (of the lid) showing a countryside scene, with soldiers parting the presumably adulterous pair. 1592 edition with flap: Folger Shakespeare Library; LOC; As *Stammbücher*: HAAB Weimar, and HAB; Getty Research Institute (with flap; Fig. 13.3); NEWBERRY.  
1593 without the flap. SUB GÖTTINGEN; HAB.
225. Fabri, Alexandre. *Diversarvm Nationvm Ornatvs*. Three volumes from 1593 and after 1596, copied from Bertelli, and including the five flaps. Copies at NYPL Spencer Collection; Amsterdam Rijksprentenkabinet; Biblioteca Marciana, Venice; Buffalo NY, Grosvenor Rare Book Room; Cicognara; Getty Research Institute.
226. Bry, Johann Theodor de. *Emblemata Saecularoa*. Possibly Frankfurt am Main, 1596 and 1611. Barrel-lid flap shows a soldier and his lover being discovered in a wine barrel by the woman's husband. Copy after Cat. A 2, possibly also by Theodor de Bry, ca. 1596. BSB; Veste Coburg (copies with and without flap); NEWBERRY.
227. Bolton, Edmund. *The elements of armories*. At London: Printed by George Eld, 1610, volvelle demonstrating the proper way to design a coat of arms. BEINECKE; Getty Research Institute (partial); LOC; NEWBERRY; NYPL Rare Books (missing movable parts).
228. Fra Lino Moroni. *Descrizione del sacro monte della Vernia*. Florence: 1612. Multiple overlays of landscape and architecture, including a rood screen. NYPL Spencer Collection; NEWBERRY (Fig. 1.10).  
Literature: Bury, 50, cat. 41; Reed, entries on Raffaello Schiaminossi.
229. Praetorius, Michael. *Syntagma musicum*. [No publisher or location], ca. 1614-20, flap on plate 2 of 1620 supplement, which shows the rear-choir mechanism. BEINECKE, BL, Selch collection, NYC (missing flap); NEWBERRY.
230. Hulsen, Esaias. *Aigentliche wahrhaffte Delineati...* Württemberg. 1618, festival book; plates 5-10 with movable engravings showing performers and nobles under parade floats. BEINECKE; NEWBERRY; NYPL Performing Arts; HAB (online: <http://diglib.hab.de/drucke/36-17-4-geom-2f-1/start.htm>).
231. Bry, Johann Theodor de. *Proscenium vitae humanae, siue EMBLEMATVM SECVLARIVM*, (Frankfurt am



BRILL

Main, 1627), new edition of *Emblemata Saecularia*, including wine-cellar scene. No copies found with flap or residue. NEWBERRY; NYPL Rare Books; Cicognara.

232. Hexham, Henry. *The first [third] part of the principles of the art military, practiced in the warres of the United Netherland, vnder the commaund of His Highnesse the Prince of Orange our captaine general ...* Second ed. (first 1637) part three printed by James Moxon, 1642-3. Revolving full-page illustrations of military formations, 46-7. BEINECKE; Newbery (1642).

233. Harsdörffer, Georg Philipp. *Frauenzimmer Gesprächspiels*. vol. 4, XI, Nurnberg: Wolfgang Endtern, 1644. Flapped portrait of the author beneath a curtain. BEINECKE.

234. Certani, Giacomo. *Maria Vergine Coronata Descrizione ...* Reggio: Prospero Vedratti, 1675. One or two lift-the-flap plates in festival procession. BEINECKE; British Library; Getty; NEWBERRY.
